# Supplementary material for: Where Is Current Research on Blockchain Technology?—A Systematic Review
Source: PubMed Central journal article supplement (PMC5047482; doi:10.1371/journal.pone.0163477), 2016-10-03
Supplement: pone.0163477.s001.pdf [file pone.0163477.s001.pdf]

S1 Table. The full list of selected primary papers

| <b>ID</b> | <b>Authors</b>                  | <b>Year</b> | <b>Paper and publication type</b> | <b>Topic</b>                   |
|-----------|---------------------------------|-------------|-----------------------------------|--------------------------------|
| ID01      | Koshy et al. [35]               | 2014        | Improvement / conference          | Privacy                        |
| ID03      | Möser et al. [49]               | 2013        | Improvement / conference          | Privacy                        |
| ID04      | Zhang & Wen [22]                | 2015        | Application / conference          | Others: New cryptocurrencies   |
| ID05      | Feld et al. [53]                | 2014        | Improvement / workshop            | Privacy                        |
| ID06      | Anish [15]                      | 2014        | Improvement / conference          | Wasted resources               |
| ID07      | Decker & Wattenhofer [36]       | 2014        | Report / symposium                | Security                       |
| ID08      | Battista et al. [51]            | 2015        | Improvement / symposium           | Usability                      |
| ID09      | Spagnuolo et al. [23]           | 2014        | Improvement / conference          | Usability                      |
| ID11      | Valenta & Rowan [24]            | 2015        | Improvement / workshop            | Privacy                        |
| ID12      | Bamert et al. [18]              | 2014        | Improvement / workshop            | Security                       |
| ID13      | Ateniese et al. [19]            | 2014        | Improvement / conference          | Security                       |
| ID14      | Vandervort [25]                 | 2014        | Improvement / workshop            | Usability                      |
| ID15      | Ziegeldorf et al. [47]          | 2015        | Improvement / conference          | Privacy                        |
| ID16      | Ruffing et al. [37]             | 2014        | Improvement / symposium           | Privacy                        |
| ID18      | Luu et al. [46]                 | 2015        | Improvement / conference          | Security                       |
| ID20      | Wan et al. [43]                 | 2015        | Application / conference          | Others: Smart contracts        |
| ID21      | Bos et al. [26]                 | 2014        | Report / conference               | Security                       |
| ID22      | Vasek et al. [27]               | 2014        | Report / workshop                 | Security                       |
| ID23      | Wang & Liu [21]                 | 2015        | Improvement / conference          | Wasted resources               |
| ID24      | Wilson & Ateniese [44]          | 2015        | Application / conference          | Others: Trustworthiness        |
| ID25      | Barkatullah & Hanke [54]        | 2015        | Improvement / journal             | Wasted resources               |
| ID26      | Androulaki & Karame [41]        | 2014        | Improvement / conference          | Privacy                        |
| ID27      | Saxena et al. [28]              | 2014        | Improvement / workshop            | Privacy                        |
| ID28      | Decker & Wattenhofer [52]       | 2013        | Improvement / conference          | Security                       |
| ID29      | Vandervort et al. [29]          | 2015        | Application / workshop            | Others: New cryptocurrencies   |
| ID30      | Eyal & Sirer [30]               | 2014        | Improvement / conference          | Security                       |
| ID31      | Decker et al. [38]              | 2015        | Improvement / symposium           | Usability                      |
| ID32      | Andrychowicz et al. [31]        | 2015        | Improvement / workshop            | Security                       |
| ID33      | Andrychowicz & Dziembowski [40] | 2015        | Application / conference          | Others: P2P broadcast protocol |
| ID34      | Meiklejohn & Orlandi [32]       | 2015        | Improvement / workshop            | Privacy                        |
| ID36      | Herrera-Joancomart [6]          | 2015        | Report / workshop                 | Privacy                        |
| ID37      | Armknecht et al. [42]           | 2015        | Report / conference               | Security                       |
| ID38      | Lim et al. [48]                 | 2014        | Report / conference               | Security                       |
| ID39      | Garay et al. [39]               | 2015        | Improvement / conference          | Security                       |

|      |                          |      |                            |                         |
|------|--------------------------|------|----------------------------|-------------------------|
| ID40 | Kishigami et al. [50]    | 2015 | Application / conference   | Others: Smart contracts |
| ID42 | Vasek & Moore [33]       | 2015 | Report / conference        | Security                |
| ID43 | Paul et al. [16]         | 2014 | Improvement / conference   | Wasted resources        |
| ID44 | Beikverdi & Song [20]    | 2015 | Report / conference        | Security                |
| ID45 | Mann & Loebenberger [17] | 2015 | Improvement / workshop     | Security                |
| ID46 | Bigi et al. [45]         | 2015 | Application / book chapter | Others: Smart contracts |
| ID47 | Ali et al. [34]          | 2015 | Application / workshop     | Others: Botnet          |
